# Supplementary material for: Discovery of Two Mycoviruses by High-Throughput Sequencing and Assembly of Mycovirus-Derived Small Silencing RNAs From a Hypovirulent Strain of Sclerotinia sclerotiorum
Source: PubMed Central journal article supplement (PMC6626909; doi:10.3389/fmicb.2019.01415), 2019-07-02
Supplement: Data_Sheet_1.pdf [file Data_Sheet_1.pdf]

|               |     | <u>MTR I</u>      |                | <u>MTR II</u> |            | <u>MTR III</u>   |                |                 |           |
|---------------|-----|-------------------|----------------|---------------|------------|------------------|----------------|-----------------|-----------|
| <b>PhMV</b>   | 50  | ILSFGIPVSGLGTDPHP | PIHKTIEIHL     | LFTHW (29)    | HLLNYRLTSA | TCRYPET (74)     | HHAGSYDQPLDALS | SWLKIHSIPHP     |           |
| <b>ChiYMV</b> | 50  | LISSGIPVSGFGTTPHP | HAVHKTIEIETFL  | LFNHW (29)    | ELINRYRLT  | PADTVRYPTT (74)  | HHAGSYNQPLQALS | SWLKVNSISHP     |           |
| <b>OyMV</b>   | 50  | LLAAGIPTSGFGCNPH  | HAVHKVLETFL    | LFNHW (29)    | ELVNYRLT   | AAADSVRYPST (74) | HHAGSYDQPLDAIS | SWLKLNSIHP      |           |
| <b>KyMV</b>   | 50  | LLKSGIPINSFGSSPH  | HPAHTKLETHL    | LFTHW (29)    | HLHNYRLT   | PDSVRFPT (74)    | HSAGSYNQPI     | TALS            |           |
| <b>TyMV</b>   | 50  | LNSYGIPVSGLGTSH   | HPAAHKTIEIETFL | LFTHW (29)    | ELKNRYRL   | HPNDSTRYPFT (74) | HEAGSYNQPSDAH  | SWLRINSIRLG     |           |
| <b>AsAV</b>   | 50  | LLQAGIQTSGLGTTP   | HPVHVLETNL     | LFNHW (29)    | ELLYRVT    | PNDSVRYPTT (74)  | HYAGSYNQPLSAIQ | WIKISSIHP       |           |
| <b>GFKV</b>   | 163 | LNQAGIPATSYPH     | QSPHPIHKTIEIHL | LHEHW (36)    | HLLNPL     | ILTARDRYTHL (76) | NPSSSYTQPLTATQ | WLTSSITAG       |           |
| <b>SsMTV1</b> | 189 | LGSAGVPTPAYPTMK   | HAHPGHRLENYL   | YQVAW (30)    | ELVNCDL    | THKDL            | SRYPGPK (75)   | DPAGSYRQPLDAHKL | LNPSRVSVV |
|               |     | : *               | : .            | : *           | : *        | : *              | : *            | : *             | : *       |

  

|               |      | <u>HEL I</u>   |                   | <u>HEL II</u> |       | <u>HEL III</u> |         | <u>HEL IV</u> |      | <u>HEL V</u>      |            |                 |                 |
|---------------|------|----------------|-------------------|---------------|-------|----------------|---------|---------------|------|-------------------|------------|-----------------|-----------------|
| <b>PhMV</b>   | 1059 | ISGFAGCGKTHPIQ | HLL (49)          | LVIDE         | CYKCP | RYH (10)       | LLGDPLQ | GGEYHS (20)   | IDCW | CWWTYRLPIKTA (43) | HAI        | TISSSQGGTYDEINT |                 |
| <b>ChiMV</b>  | 985  | IAGFAGCGKTLPLV | QHLL (48)         | LVIDE         | IYKLP | RGY (10)       | ILGDPLQ | GGEYHS (20)   | IDCW | CFWSYRIP          | TSAFA (43) | HAI             | TISSSQGTTFQEAHT |
| <b>TyMV</b>   | 974  | FAGFAGCGKTYPIQ | QLL (48)          | LVIDE         | IYKMP | RGY (10)       | ILGDPLQ | GGEYHS (20)   | IDM  | CWWSYRIP          | QCIA (43)  | RSCT            | ISSSQGLTFCDPAI  |
| <b>OyMV</b>   | 897  | IAGFP          | CGKSHPIQKLL (48)  | LVIDE         | IYKLP | RGY (10)       | MLGDPLQ | GGEYHS (20)   | IDCW | CWWTYRCP          | KAVA (43)  | HAL             | TISSSQGMTYSDPVT |
| <b>KyMV</b>   | 1000 | LAFGAGCGKTKPLQ | SLL (48)          | LVIDE         | IYKLP | RGY (10)       | ILGDPLQ | GGEYHS (20)   | IDH  | CWWTYRVP          | SHLIA (47) | PAT             | TISSSQGVTHHNRVT |
| <b>AsAV</b>   | 934  | IAGFAGCGKTHPIQ | HLL (48)          | LVIDE         | IYKLP | RGY (10)       | LLGDPLQ | GGEYHS (20)   | IDH  | CWWTYRVP          | SHIS (47)  | PSCT            | ISSSQGMTFRKHVT  |
| <b>GFKV</b>   | 1046 | IAGFAGCGKSYPIQ | QLL (48)          | LVIDE         | VYKLP | RGY (10)       | ILGDPLQ | GGSYNP (20)   | IDF  | YCLWTRRL          | PRLVA (43) | RAIT            | YAASQGSTYPAPVH  |
| <b>SsMTV1</b> | 1118 | VLGAP          | CGGKSAFLQDFL (51) | LVIDE         | ISLFP | PGY (10)       | ILGDHCQ | CRFHS (20)    | GSQ  | YLLQFHRA          | PQLLA (43) | KAFT            | FQAGSRSFRPVQI   |
|               |      | * .            | ***: * : *        | : * :         | ***   | * :            | : ***   | * ::          | . *  | ** :              | : *        | : *             | : *             |

  

|               |      | <u>RdRP I</u> |                | <u>RdRP II</u> |         | <u>RdRP III</u> |             |        |          |         |          |        |      |     |
|---------------|------|---------------|----------------|----------------|---------|-----------------|-------------|--------|----------|---------|----------|--------|------|-----|
| <b>ChiMV</b>  | 1530 | TSVRI         | FAKAQHKVNDSSIF | SNWKACQ        | TLALMHD | YIILV           | LPVKKYQRI   | YDQRE  | PPQIYY   | HCGHT   | PQLSQWCS | QHLQS  |      |     |
| <b>OyMV</b>   | 1418 | TVVRI         | FAKSQHKVNDGSI  | FGSWKACQ       | TLALMHD | FVIL            | SLGPVKKYQRI | IDHYDR | PNFIYTH  | CGKTP   | SEL      | SAWSH  | FLKG |     |
| <b>AsAV</b>   | 1457 | TAVKI         | FAKSQHKVNDGSI  | FGPWKACQ       | TLALMHD | FVIL            | SLGPVKKYQRL | FDQADR | PSHLYTH  | CGKTP   | QDLS     | WCSA   | HLSH |     |
| <b>KyMV</b>   | 1522 | TAVKI         | FAKSQHKVNDAS   | IFGNWKACQ      | TLALMHD | FVIL            | SLGPVKKYQRI | FDALDR | PPHLYTH  | CGKSPAD | SAWC     | QTHLTG |      |     |
| <b>TyMV</b>   | 1492 | TTVKI         | FAKAQHKVNDGSI  | FGSWKACQ       | TLALMHD | YVIL            | VLPVKKYQRI  | FDNADR | PPNIYSH  | CGKTP   | PNQLRD   | WCQE   | HLTH |     |
| <b>PhMV</b>   | 1582 | TSVRI         | FAKAQHKVNDGSI  | FGSWKACQ       | TLALMHD | YIIL            | TLGPVKKYQRI | FDMKDR | PPHLYH   | HCGHT   | PCQL     | SAW    | CTEH | FRP |
| <b>GFKV</b>   | 1603 | TFVRI         | FSKTQHKVNDGSI  | FGSWKACQ       | TLALMHD | YIIL            | VLPVKKYQRI  | LDSDR  | DRPAHLYH | HAGQ    | TPHQ     | SEWC   | QNHL | TP  |
| <b>SsMTV1</b> | 1618 | NLVSH         | LKSQLKGM       | EAFMPAKPGQ     | TATCHDL | VLIL            | LGMNRYIR    | RMHRDR | PKNIFL   | HCGT    | SNEDL    | RDWT   | IEHW | KD  |
|               |      | . *           | ** :           | * :            | ***     | ** :            | ***         | *** :  | ** :     | ** :    | ** :     | * :    | * :  |     |

  

|               |      | <u>RdRP IV</u> |        | <u>RdRP V</u> |       | <u>RdRP VI</u> |       |          |        |        |        |                |        |         |     |
|---------------|------|----------------|--------|---------------|-------|----------------|-------|----------|--------|--------|--------|----------------|--------|---------|-----|
| <b>ChiMV</b>  | 1609 | PV-AT          | TNDYTA | FDSQ          | HGEAV | VFECFK (22)    | T-QFG | PLTCMRLT | GEPGYD | NSDYN  | LAVIYS | QYAIKS-EAIMIS  | GDDSV  | IDG     |     |
| <b>OyMV</b>   | 1497 | DA-YI          | CNDYTS | FDSQ          | HGEAV | IFESLK (22)    | T-QFG | PLTCMRLT | GEPGYD | NDYDL  | LAVIYS | QYVVISD-HPIMVS | GDDSV  | ICG     |     |
| <b>AsAV</b>   | 1536 | KT-KV          | TNDYTA | FDSQ          | HGESV | ILEALK (22)    | T-QFG | PLTCMRLT | GEPGYD | NDYDL  | IAVLYS | QYNLQN-TPVMVS  | GDDSL  | LDS     |     |
| <b>KyMV</b>   | 1599 | QI-KL          | TNDYTA | FDSQ          | HGESV | ILEALK (22)    | T-QFG | PLTCMRLT | GEPGYD | NSDYN  | LAVIHS | QFDMKD-IPVMVS  | GDDSL  | LDR     |     |
| <b>TyMV</b>   | 1571 | STPKI          | ANDYTA | FDSQ          | HGESV | ILEALK (22)    | T-QFG | PLTCMRLT | GEPGYD | NDYDL  | LAVIYS | QYDVGCS-CPIMVS | GDDSL  | IDH     |     |
| <b>PhMV</b>   | 1659 | TI-CT          | TNDYTA | FDSQ          | HGEAV | VWKCLK (22)    | T-QFG | PLTCMRLT | GEPGYD | NSDYN  | IAVIYS | QYTMQN-LPILLS  | GDDSV  | IVG     |     |
| <b>GFKV</b>   | 1682 | SV-HL          | ANDYTA | FDSQ          | HGEAV | VLEAWK (22)    | C-QFG | PLTCMRLT | GEPGYD | NDYDL  | LAILYT | QYLLHR-TPVLVS  | GDDSL  | VDR     |     |
| <b>SsMTV1</b> | 1697 | IR-ST          | TNDYTA | FDSQ          | HGESV | AFAERH (22)    | SDI   | IGEKDL   | GRDT   | GEPGYD | NCRYN  | LAVIAC         | QYIVPR | GLPILIG | GDD |
|               |      | ***            | ** :   | ** :          | ** :  | *              | :     | *        | *****  | ** :   | ** :   | ** :           | ** :   | ** :    |     |

Figure S1. Multiple alignment of three conserved domains (Mtr, Hel, and RdRp) of *Sclerotinia sclerotiorum* mycotymovirus 1 (SsMTV1/SZ-150) with corresponding regions in the referenced members of the order *Tymovirales*. The positions of the motifs are indicated by lines above the sequences with numbers from I to VI. Identical residues are shaded and indicated by asterisks; conserved and semi-conserved amino acid residues are indicated by colons and dots, respectively. Numbers in square brackets correspond to the number of amino acid residues separating the motifs. ChiYMV: Chiltepin yellow mosaic virus, OYMV: Ononis yellow mosaic virus, AsAV: Asclepias asymptomatic virus, KyMV: Kennedyya yellow mosaic virus, TYMV: Turnip yellow mosaic virus, PhyMV: Physalis mottle virus, GFkV: Grapevine fleck virus.

**Table S1 The information of all selected viruses used for phylogenetic analysis**

| <b>Virus Family</b>  | <b>Virus name</b>                                   | <b>Abbreviation</b> | <b>Accession Numbe</b> |
|----------------------|-----------------------------------------------------|---------------------|------------------------|
| <i>Chrysoviridae</i> | <b>Colletotrichum gloeosporioides chrysovirus 1</b> | <b>CgCV1</b>        | <b>KT581957</b>        |
|                      | <b>Raphanus sativus chrysovirus 1</b>               | <b>RsCV1</b>        | <b>JQ045335</b>        |
|                      | <b>Botryosphaeria dothidea chrysovirus 1</b>        | <b>BdCV1</b>        | <b>KF688736</b>        |
|                      | <b>Fusarium graminearum dsRNA mycovirus-2</b>       | <b>FgV2</b>         | <b>HQ343295</b>        |
|                      | <b>Magnaporthe oryzae chrysovirus 1-A</b>           | <b>MoCV-1A</b>      | <b>AB560761</b>        |
|                      | <b>Macrophomina phaseolina chrysovirus 1</b>        | <b>MpCV1</b>        | <b>KP900886</b>        |

|                         |                                                |                 |                  |
|-------------------------|------------------------------------------------|-----------------|------------------|
|                         | <b>Verticillium dahliae chrysovirus 1</b>      | <b>VdCV1</b>    | <b>NC_038784</b> |
| <i>Totiviridae</i>      | <b>Saccharomyces cerevisiae virus L-A</b>      | <b>ScV-L-A</b>  | <b>J04692</b>    |
|                         | <b>Saccharomyces cerevisiae virus L-BC</b>     | <b>ScV-L-BC</b> | <b>U01060</b>    |
|                         | <b>Magnaporthe oryzae virus 2</b>              | <b>MoV2</b>     | <b>AB300379</b>  |
|                         | <b>Gremmeniella abietina RNA virus L1</b>      | <b>GaRV-L1</b>  | <b>AF337175</b>  |
|                         | <b>Botryotinia fuckeliana totivirus 1</b>      | <b>BfTV1</b>    | <b>AM491608</b>  |
| <i>Partitiviridae</i>   | <b>Helicobasidium mompa partitivirus V1-1</b>  | <b>HmV-V1-1</b> | <b>AB110979</b>  |
|                         | <b>Rosellinia necatrix virus 1</b>             | <b>RnV1</b>     | <b>AB113347</b>  |
|                         | <b>Rhizoctonia solani virus 717</b>            | <b>RhsV-717</b> | <b>AF133290</b>  |
|                         | <b>Rosellinia necatrix partitivirus 2</b>      | <b>RnPV2</b>    | <b>NC_020234</b> |
|                         | <b>Rhizoctonia solani dsRNA virus 2</b>        | <b>RsPV2</b>    | <b>NC_023684</b> |
|                         | <b>Sclerotinia sclerotiorum partitivirus S</b> | <b>SsPV-S</b>   | <b>NC_013014</b> |
|                         | <b>Sclerotinia sclerotiorum partitivirus 1</b> | <b>SsPV1</b>    | <b>JX297511</b>  |
| <i>Reoviridae</i>       | <b>Cryphonectria parasitica mycoreovirus 1</b> | <b>CpMYRV1</b>  | <b>NC_010743</b> |
|                         | <b>Rosellinia necatrix mycoreovirus 3</b>      | <b>RnMYRV3</b>  | <b>NC_007535</b> |
|                         | <b>Sclerotinia sclerotiorum mycoreovirus 3</b> | <b>SsMYRV4</b>  | <b>NC_030158</b> |
| <i>Megabirnaviridae</i> | <b>Pleosporales megabirnavirus 1</b>           | <b>PMBV1</b>    | <b>KT601119</b>  |

---

|                                |                                                  |                 |                  |
|--------------------------------|--------------------------------------------------|-----------------|------------------|
|                                | <b>Rosellinia necatrix megabirnavirus 1</b>      | <b>RnMBV1</b>   | <b>NC_013462</b> |
|                                | <b>Sclerotinia sclerotiorum megabirnavirus 1</b> | <b>SsMBV1</b>   | <b>NC_027221</b> |
|                                | <b>Rosellinia necatrix megabirnavirus 2</b>      | <b>RnMBV2</b>   | <b>NC_029125</b> |
| <b><i>Botybirnaviridae</i></b> | <b>Sclerotinia sclerotiorum botybirnavirus 1</b> | <b>SsBV1</b>    | <b>NC_027138</b> |
|                                | <b>Sclerotinia sclerotiorum botybirnavirus 2</b> | <b>SsBV2</b>    | <b>KT962972</b>  |
|                                | <b>Bipolaris maydis botybirnavirus 1</b>         | <b>BmBRV1</b>   | <b>MF034087</b>  |
|                                | <b>Alternatra botybirnavirus 1</b>               | <b>ABRV1</b>    | <b>KX784491</b>  |
|                                | <b>Soybean leaf-associated botybirnavirus 1</b>  | <b>SlaBRV1</b>  | <b>KT598241</b>  |
|                                | <b>Botrytis porri botybirnavirus 1</b>           | <b>BpBV1</b>    | <b>NC_017990</b> |
| <b>Unclassified</b>            | <b>Fusarium graminearum virus DK21</b>           | <b>FgV-DK21</b> | <b>AY533037</b>  |
|                                | <b>Sclerotinia sclerotiorum RNA virus L</b>      | <b>SsRV-L</b>   | <b>EU779934</b>  |
|                                | <b>Sclerophthora macrospora virus A</b>          | <b>SmV-A</b>    | <b>AB083060</b>  |

---

**Table S2 Primer pairs used in this study.**

| <b>Primer name</b> | <b>Primer sequence (5'–3')</b>                       | <b>Application</b>              | <b>Product size (bp)</b> |
|--------------------|------------------------------------------------------|---------------------------------|--------------------------|
| actin-qF2          | GAGCTGTTTTCCCTTCCATTGTC                              | Used as an internal control     | 146                      |
| actin-qR4          | GACGACACCGTGCTCGATTGG                                |                                 |                          |
| SsHV1-F            | CCAAAACAACCCTGTGCGCC                                 | Detection for SsHV1             | 252                      |
| SsHV1-R            | CAACAAACCTGTCAGCACCC                                 |                                 |                          |
| SsBV3-F            | GGGTGACGACGGATGGGTA                                  | Detection for SsBV3             | 462                      |
| SsBV3-R            | CACAGGCAGCTTCGCTACTCT                                |                                 |                          |
| SatH-F             | AGAAATTGTTATGGCAAGCT                                 | Detection for SatH              | 1271                     |
| SatH-R             | GGGTTGATATATCCGATAAG                                 |                                 |                          |
| SsMTV1-F           | ATTGGTCAAGACTCCGTGAC                                 | Detection for SsMTV1            | 1020                     |
| SsMTV1-R           | GGAAGCATGCGCCGCTTGGT                                 |                                 |                          |
| random dN6         | CGATCGATCATGATGCAATGCNNNNNN                          | To obtain the viral cDNA        |                          |
| Oligo (dT)18       | d(TTTTTTTTTTTTTTTTTT)                                |                                 |                          |
| 5'Long primer      | CTAATACGACTCACTATAGGGCAAGCAGTGGTATCAACGCAGAGT        | Termini determination of SsMTV1 |                          |
| RACE-OLIGO:        | GCATTGCATCATGATCGATCGAATTCTTTAGTGAGGGTTAATTGCC-(NH2) |                                 |                          |
| O5RACE -1          | GGCAATTAACCCTCACTAAAG                                |                                 |                          |
| O5RACE -2          | TCACTAAAGAATTCGATCGATC                               |                                 |                          |
| O5RACE -3          | CGATCGATCATGATGCAATGC                                |                                 |                          |
| SsMTV1_5'1         | GAAAGGGTCGTAACGGTATTCG                               |                                 |                          |
| SsMTV1_5'2         | CTGTGGAGATAGCCATCGTTCA                               |                                 |                          |
| C1-F               | GACGAAATTTCTCTCTTTCCCCCG                             | To fill the gap of SsMTV1       |                          |
| C1-R               | TATTATACTgTCTAgTTCCgAC                               |                                 |                          |

|             |                          |                                           |  |
|-------------|--------------------------|-------------------------------------------|--|
| C2-F        | GTAGAACTCTCTGACACCTCAA   |                                           |  |
| C2-R        | GGGCCGCGATCTGACCATGGCAGT |                                           |  |
| SsBV3_L1-1F | GCAAATAAAAGAGCTGCCTT     | To determine the genome of SsBV3-L1-dsRNA |  |
| SsBV3_L1-1R | ATCTTCTTCTAATACCACCT     |                                           |  |
| SsBV3_L1-2F | CACCACAAGCGCAGTGACGA     |                                           |  |
| SsBV3_L1-2R | ATCTTCTTCTAATACCACCT     |                                           |  |
| SsBV3_L1-3F | TGAGTCAGAGATGGAGGAGA     |                                           |  |
| SsBV3_L1-3R | CAGGTAGCGTGATCATGTTG     |                                           |  |
| SsBV3_L1-4F | TGACAGCAGAAGGATTCAAC     |                                           |  |
| SsBV3_L1-4R | TCTAACCTGTTCTTGCCCAA     |                                           |  |
| SsBV3_L1-5F | GCAGAAAGTAGCGCAGGAGA     |                                           |  |
| SsBV3_L1-5R | AAACTCACCTTTCGCCCACT     |                                           |  |
| SsBV3_L1-6F | GATCAAAGAAGGGATCTTGA     |                                           |  |
| SsBV3_L1-6R | CTACCCATCCGTCGTCACCC     |                                           |  |
| SsBV3_L1-7F | AACCTCACGTACCACCACAT     |                                           |  |
| SsBV3_L1-7R | GCTATCTATTCACTTCTCCC     |                                           |  |
| SsBV3_L2-1F | GCAAATAAAAGAGCTGCCTA     | To determine the genome of SsBV3-L2-dsRNA |  |
| SsBV3_L2-1R | GGCATCTTGTTTGGTTTGAA     |                                           |  |
| SsBV3_L2-2F | TGTGCATCGCTATCGCGCGC     |                                           |  |
| SsBV3_L2-2R | AAGTGAATTGCACAACGGTA     |                                           |  |
| SsBV3_L2-3F | G TTCAGATAACAATAAGACAG   |                                           |  |
| SsBV3_L2-3R | GCAAATCGGTCTGCACAGTG     |                                           |  |
| SsBV3_L2-4F | CRAAGGCTCGCCACACGGG      |                                           |  |
| SsBV3_L2-4R | GGTGTCTTTGCGGGAAAGAG     |                                           |  |
| SsBV3_L2-5F | TGGCCGAGTTCGGTGAAAGA     |                                           |  |

|             |                      |  |  |
|-------------|----------------------|--|--|
| SsBV3_L2-5R | AGCTTCTCTTCTGTACCCGC |  |  |
| SsBV3_L2-6F | AAAAGGCACAGGAGAGGGAG |  |  |
| SsBV3_L2-6R | GCTCTGTAATTACTCCTTC  |  |  |
